# Supplementary material
Source: PubMed Central journal article supplement (PMC4179254)

## Spintrap Fluidic Simulation Results

Spintrap fluidic simulations show gradual deceleration and soft landing of cells to glass surface under 50g gravitational field.

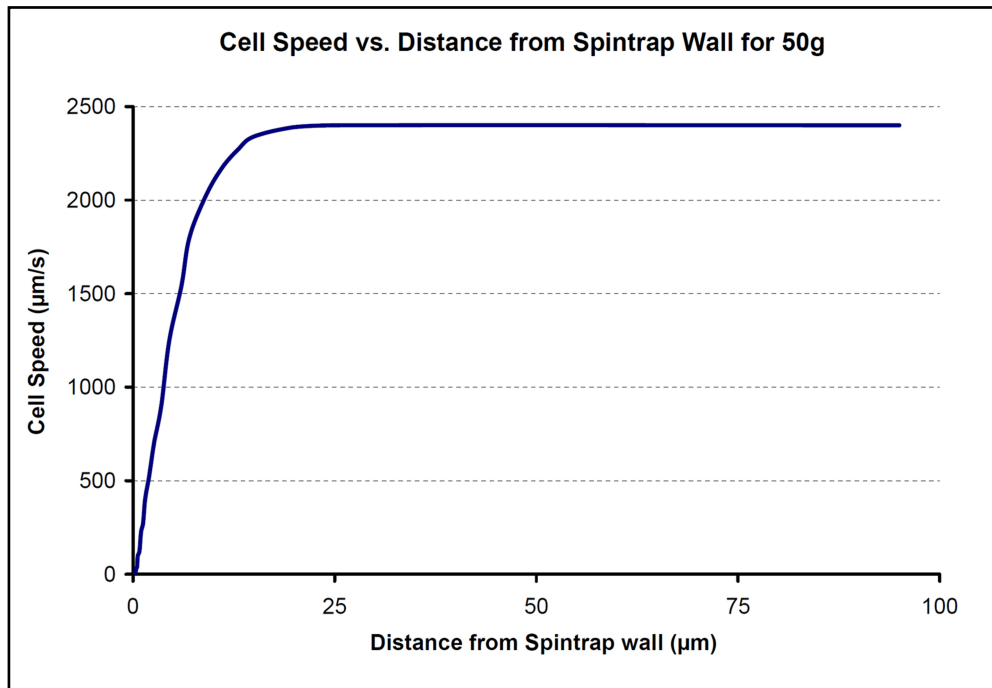

Supplement: NIHMS627581-supplement-Supplemental_2.pdf [file NIHMS627581-supplement-Supplemental_2.pdf]
