# Supplementary material
Source: PubMed Central journal article supplement (PMC4179254)

# CTC-iChip2 Design CAD

Design file of CTC-iChip2. This file can be converted and sent for production of a mask which can be used for production of CTC-iChip masters and molds within a clean room using soft-lithography.

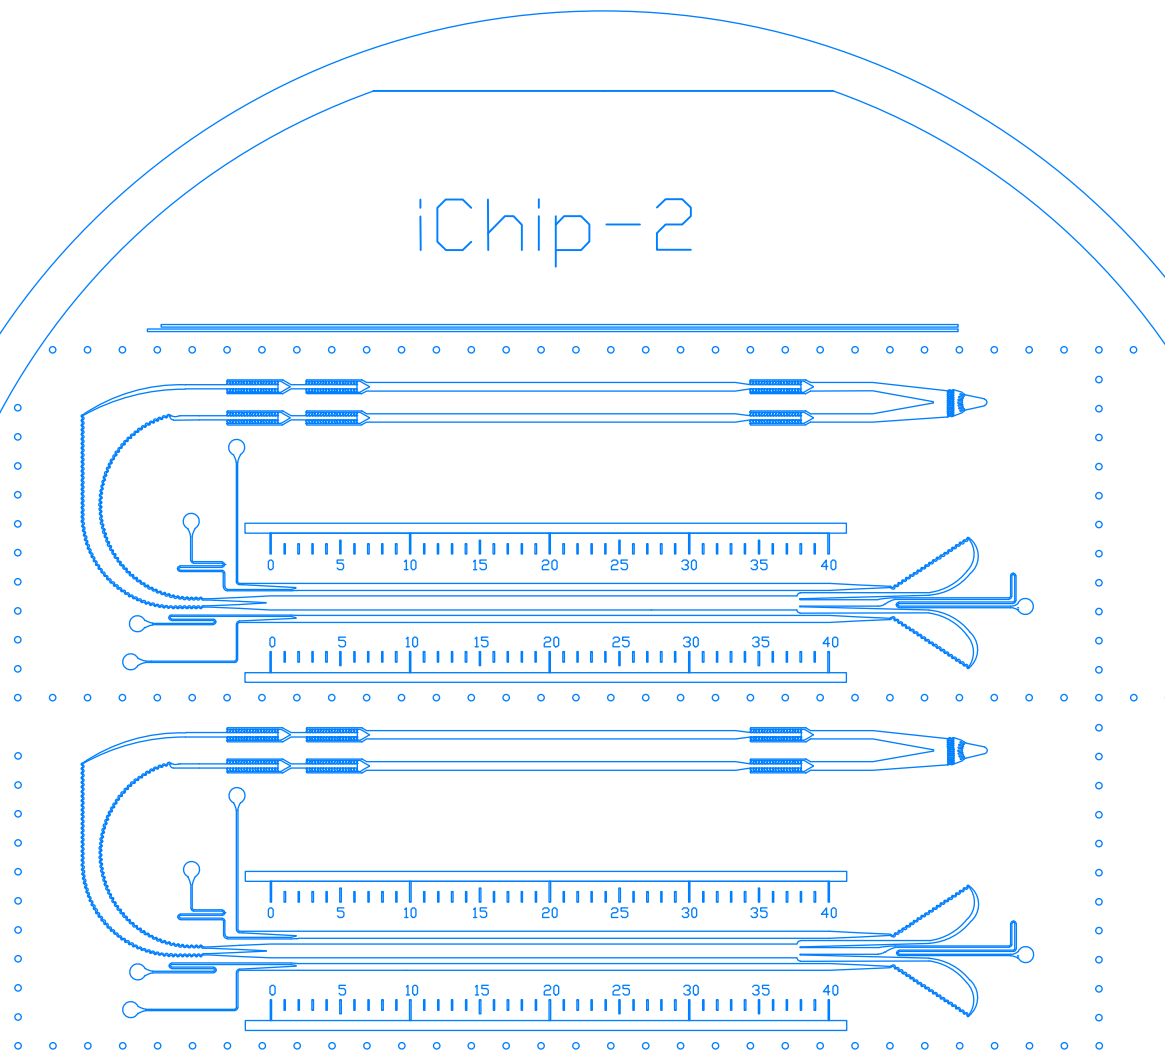

Supplement: NIHMS627581-supplement-Supplemental_Data.pdf [file NIHMS627581-supplement-Supplemental_Data.pdf]
